# Supplementary material for: A trifunctional polyethylene oxide buffer layer for stable and efficient all-inorganic CsPbBr3perovskite solar cells
Source: Royal Society of Chemistry journal article supplement (doi:10.1039/d3dt00169e), 2023-01-01
Supplement: d3dt00169e1.pdf [file d3dt00169e1.pdf]

Supporting Information for  
**Trifunctional polyethylene oxide buffer layer for stable and efficient  
all-inorganic CsPbBr<sub>3</sub> perovskite solar cells**

Jin Tan,<sup>a</sup> Jie Dou<sup>a,\*</sup>, Jialong Duan<sup>a</sup>, Yuanyuan Zhao<sup>a</sup>, Benlin He<sup>b</sup>, Qunwei Tang<sup>a</sup>

<sup>a</sup> Institute of Carton Neutrality, College of Chemical and Biological Engineering, Shandong University of Science and Technology, Qingdao 266590, PR China.

<sup>b</sup> College of Materials Science and Engineering, Ocean University of China, Qingdao 266100, PR China.

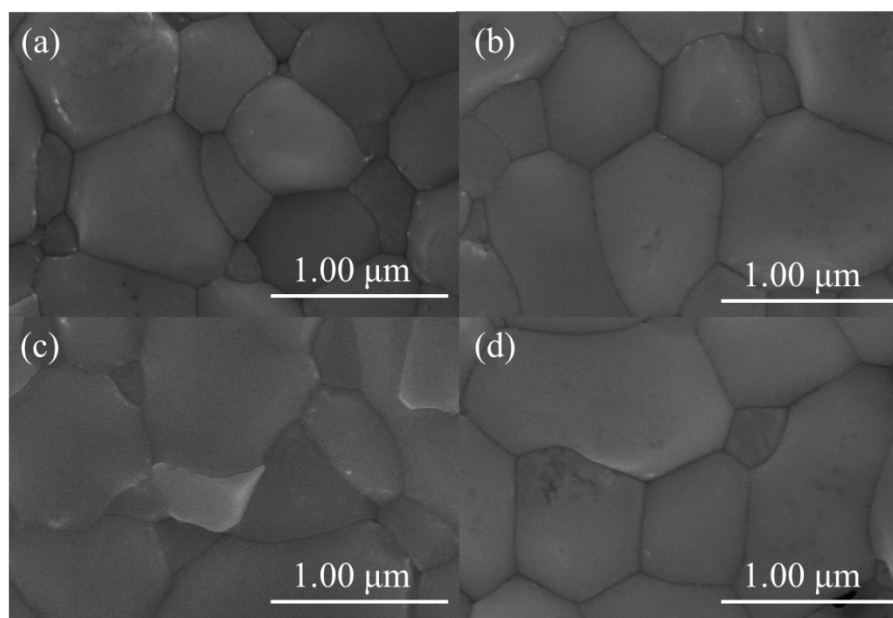

**Figure S1.** Top-view SEM images of (a) pristine CsPbBr<sub>3</sub> films as well as the CsPbBr<sub>3</sub> films tailored by (b) PEO-0.05,

(c) PEO-0.1 and (d) PEO-0.5.

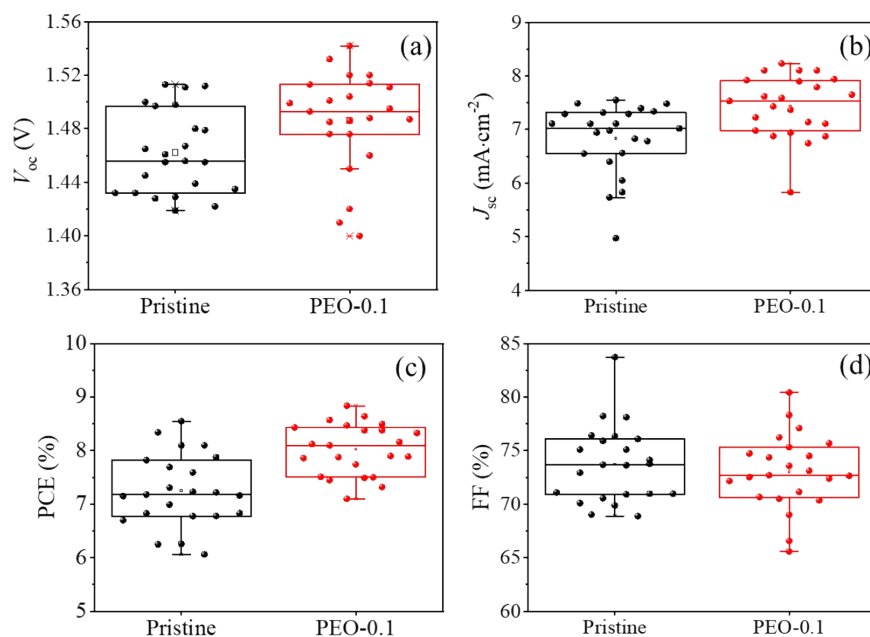

**Figure S2.** Box charts for the photovoltaic data of (a)  $J_{sc}$ , (b)  $V_{oc}$ , (c) FF and (d) PCE for the carbon-based HTM-free all-inorganic CsPbBr<sub>3</sub> PSCs without and with PEO-0.1.

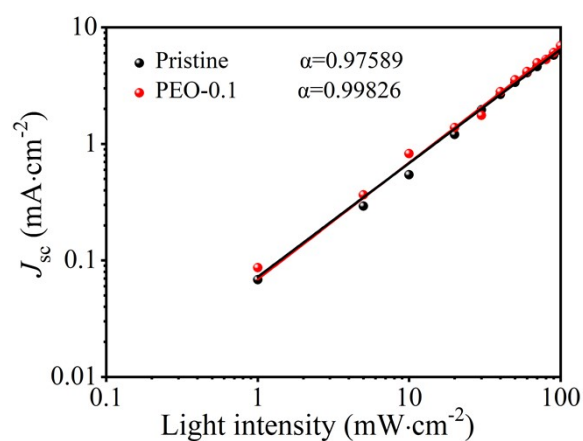

**Figure S3.**  $J_{sc}$  upon light intensity modulated  $J$ - $V$  measurements.

**Table S1.** Photovoltaic data of the carbon-based HTM-free all-inorganic CsPbBr<sub>3</sub> PSCs with and without PEO modification.

| Samples  | $V_{oc}$ (V) | $J_{sc}$ (mA cm <sup>-2</sup> ) | PCE (%) | FF (%) |
|----------|--------------|---------------------------------|---------|--------|
| Pristine | 1.429        | 5.73                            | 6.25    | 76.33  |
| PEO-0.05 | 1.486        | 7.14                            | 7.5     | 70.69  |

|         |       |      |      |       |
|---------|-------|------|------|-------|
| PEO-0.1 | 1.495 | 7.80 | 8.84 | 75.81 |
| PEO-0.5 | 1.458 | 6.47 | 7.32 | 77.6  |

**Table S2.** The photovoltaic data for the state-of-the-art carbon-based HTM-free all-inorganic CsPbBr<sub>3</sub> PSCs.

| Samples                                                                            | $V_{oc}$ (V) | $J_{sc}$ (mA cm <sup>-2</sup> ) | PCE (%) | FF (%) | Ref       |
|------------------------------------------------------------------------------------|--------------|---------------------------------|---------|--------|-----------|
| FTO/TiO <sub>2</sub> /DTPT/CsPbBr <sub>3</sub> /DTPD/Carton                        | 1.574        | 8.52                            | 11.21   | 83.67  | 1         |
| FTO/TiO <sub>2</sub> /CsPbBr <sub>3</sub> /DCC/Carton                              | 1.611        | 7.79                            | 10.16   | 80.96  | 2         |
| FTO/TiO <sub>2</sub> /CsPbBr <sub>3</sub> /I Br-CQDs/Carton                        | 1.651        | 7.84                            | 10.79   | 83.36  | 3         |
| FTO/SnO <sub>2</sub> -SnS <sub>2</sub> /CsPbBr <sub>3</sub> /Carton                | 1.635        | 7.80                            | 10.72   | 84.04  | 4         |
| FTO/TiO <sub>2</sub> /CsPbBr <sub>3</sub> /Carton                                  | 1.46         | 8.12                            | 9.6     | 81     | 5         |
| FTO/TiO <sub>2</sub> /CsPbBr <sub>3</sub> /DAP/Carton                              | 1.621        | 7.57                            | 10.31   | 84.05  | 6         |
| FTO/TiO <sub>2</sub> /CsPbBr <sub>3</sub> /Carton                                  | 1.43         | 6.81                            | 7.81    | 79.96  | 7         |
| FTO/TiO <sub>2</sub> /CsPbBr <sub>3</sub> /Carton                                  | 1.30         | 5.64                            | 5.30    | 72.3   | 8         |
| FTO/TiO <sub>2</sub> /CsPbBr <sub>3</sub> - thiourea /Carton                       | 1.38         | 8.81                            | 9.11    | 75     | 9         |
| FTO/TiO <sub>2</sub> /CsPbBr <sub>3</sub> /UV-360 /Carton                          | 1.568        | 7.69                            | 9.61    | 79.70  | 10        |
| FTO/TiO <sub>2</sub> /CsPbBr <sub>3</sub> /Pt <sub>3</sub> M Carton                | 1.520        | 6.77                            | 7.62    | 74.05  | 11        |
| FTO/SnO <sub>2</sub> /GQDs/CsPbBr <sub>3</sub> /Carton                             | 1.522        | 7.91                            | 9.51    | 78.4   | 12        |
| ITO/SnO <sub>2</sub> /GQDs/CsPbBr <sub>3</sub> /Carton                             | 1.530        | 4.79                            | 5.71    | 77.9   | 13        |
| FTO/SnO <sub>2</sub> -RbCl/CsPbBr <sub>3</sub> /Carton                             | 1.601        | 7.69                            | 10.04   | 81.6   | 14        |
| FTO/N-TiO <sub>2</sub> /CsPbBr <sub>3</sub> /Carton                                | 1.58         | 6.55                            | 8.50    | 81.96  | 15        |
| FTO/TiO <sub>2</sub> /CsPbBr <sub>3</sub> -Br-GO/Carton                            | 1.579        | 7.72                            | 9.44    | 77.44  | 16        |
| FTO/TiO <sub>2</sub> /CsPbBr <sub>3</sub> -g-C <sub>3</sub> N <sub>4</sub> /Carton | 1.277        | 7.80                            | 8.00    | 80.32  | 17        |
| FTO/TiO <sub>2</sub> /T-CsPbBr <sub>3</sub> /Carton                                | 1.595        | 7.56                            | 9.82    | 81.41  | 18        |
| FTO/TiO <sub>2</sub> /Ac/CsPbBr <sub>3</sub> /Carton                               | 1.595        | 7.31                            | 9.60    | 82.33  | 19        |
| FTO/TiO <sub>2</sub> /M-CsPbBr <sub>3</sub> /Carton                                | 1.584        | 7.42                            | 9.65    | 82.11  | 20        |
| FTO/TiO <sub>2</sub> /CsPbBr <sub>3</sub> -L-lysine/Carton                         | 1.565        | 7.64                            | 9.68    | 81.0   | 21        |
| FTO/TiO <sub>2</sub> /CsPbBr <sub>3</sub> /[BMIM]Cl/Carton                         | 1.61         | 7.45                            | 9.92    | 83     | 22        |
| FTO/Sb-TiO <sub>2</sub> /CsPbBr <sub>3</sub> /Carton                               | 1.586        | 6.64                            | 8.26    | 78.4   | 23        |
| FTO/TiO <sub>2</sub> /CsPbBr <sub>3</sub> /Carton                                  | 1.545        | 7.37                            | 9.35    | 82.2   | 24        |
| FTO/TiO <sub>2</sub> /CsPbBr <sub>3</sub> -PEG/Carton                              | 1.41         | 7.56                            | 7.8     | 73     | 25        |
| FTO/TiO <sub>2</sub> /CsPbBr <sub>3</sub> -BiBr <sub>3</sub> /Carton               | 1.39         | 7.83                            | 8.73    | 80     | 26        |
| FTO/TiO <sub>2</sub> /CsPbBr <sub>3</sub> /Carton                                  | 1.15         | 7.65                            | 5.84    | 66.3   | 27        |
| FTO/Sr-TiO <sub>2</sub> /CsPbBr <sub>3</sub> /Carton                               | 1.23         | 6.54                            | 5.92    | 73.6   | 28        |
| FTO/TiO <sub>2</sub> /CsPbBr <sub>3</sub> /Carton-PANi/G                           | 1.59         | 6.87                            | 8.87    | 81.21  | 29        |
| FTO/SQE/CsPbBr <sub>3</sub> /Carton                                                | 1.572        | 7.68                            | 9.15    | 75.8   | 30        |
| FTO/TiO <sub>2</sub> /CsPbBr <sub>3</sub> /ONC/CNT                                 | 1.33         | 5.55                            | 5.87    | 80     | 31        |
| FTO/TiO <sub>2</sub> /CsPbBr <sub>3</sub> -SnBr <sub>2</sub> /Carton               | 1.37         | 7.66                            | 8.63    | 82.22  | 32        |
| FTO/TiO <sub>2</sub> /CsPbBr <sub>3</sub> /PVAc/Carton                             | 1.540        | 7.28                            | 8.62    | 76.91  | 33        |
| FTO/TiO <sub>2</sub> /CsPbBr <sub>3</sub> / Carton                                 | 1.34         | 6.46                            | 5.86    | 68.04  | 34        |
| FTO/TiO <sub>2</sub> /CsPbBr <sub>3</sub> -ZrO/Carton                              | 1.44         | 7.75                            | 8.19    | 73.52  | 35        |
| FTO/TiO <sub>2</sub> /CsPbBr <sub>3</sub> -RPQDs/ Carton                           | 1.470        | 7.33                            | 8.20    | 76     | 36        |
| FTO/TiO <sub>2</sub> /CsPbBr <sub>3</sub> /CdZnSe@ZnSe/ Carton                     | 1.498        | 7.25                            | 8.65    | 79.6   | 37        |
| FTO/TiO <sub>2</sub> /CsPbBr <sub>3</sub> / Carton                                 | 1.20         | 5.3                             | 3.9     | 64     | 38        |
| FTO/ TiO <sub>2</sub> /CsPbBr <sub>3</sub> / PEO/Carton                            | 1.495        | 7.80                            | 8.84    | 75.81  | This work |

**Table S3.** The summary of carrier lifetime from TRPL analysis.

| Sample   | $\tau_1$ (ns) | $\tau_2$ (ns) |
|----------|---------------|---------------|
| Pristine | 0.195         | 2.37          |
| PEO-0.05 | 0.107         | 2.66          |
| PEO-0.1  | 0.087         | 2.78          |
| PEO-0.5  | 0.126         | 2.43          |

**Table S4.** The summary of impedance from EIS analysis.

| Sample   | $R_s$ (ohm) | $R_{rec}$ (ohm) |
|----------|-------------|-----------------|
| Pristine | 310         | 500             |
| PEO-0.05 | 244.8       | 700             |
| PEO-0.1  | 192.6       | 1100            |
| PEO-0.5  | 299.2       | 624.1           |

## Reference

- R. Guo, J. Xia, H. Gu, X. Chu, Y. Zhao, X. Meng, Z. Wu, J. Li, Y. Duan, Z. Li, Z. Wen, S. Chen, Y. Cai, C. Liang, Y. Shen, G. Xing, W. Zhang, G. Shao, *J. Mater. Chem. A*, 2023, **11**, 408-418.
- J. Zhu, Y. Liu, B. He, W. Zhang, L. Cui, S. Wang, H. Chen, Y. Duan, Q. Tang, *Chem. Eng. J.*, 2022, **428**, 131950.
- J. Zhu, B. He, M. Wang, X. Yao, H. Huang, C. Chen, H. Chen, Y. Duan, Q. Tang, *Nano Energy*, 2022, **104**, 107920.
- X. Yao, B. He, J. Zhu, J. Ti, L. Cui, R. Tui, M. Wei, H. Chen, J. Duan, Y. Duan, Q. Tang, *Nano Energy*, 2022, **96**, 107138.
- J. Yan, S. Hou, X. Li, J. Dong, L. Zou, M. Yang, J. Xing, H. Liu, H. Hao, *Solar Energ. Mater. Sol. C.*, 2022, **234**, 111420.
- J. Ti, J. Zhu, B. He, Z. Zong, X. Yao, R. Tui, H. Huang, C. Chen, H. Chen, Y. Duan, Q. Tang, *J. Mater. Chem. A*, 2022, **10**, 6649-6661.
- L. Liu, S.-E. Yang, P. Liu, Y. Chen, *Solar Energy*, 2022, **232**, 320-327.
- X. Cao, G. Zhang, L. Hao, X. Ding, T. Dong, X. Li, Q. Zeng, X. He, Y. Jia, J. Wei, *J. Alloy. Compd.*, 2022, **919**, 165722.
- J. Bi, J. Chang, M. Lei, W. Zhang, F. Meng, G. Wang, *ACS Appl. Mater. Interfaces*, 2022, **14**, 48888-48896.
- J. Zhu, M. Tang, B. He, K. Shen, W. Zhang, X. Sun, M. Sun, H. Chen, Y. Duan, Q. Tang, *Chem. Eng. J.*, 2021, **404**, 126548.
- Y. Zhao, J. Zhu, B. He, Q. Tang, *Chem. Commun.*, 2021, **57**, 7577-7580.
- Y. Zhao, J. Zhu, B. He, Q. Tang, *ACS Appl. Mater. Interfaces*, 2021, **13**, 11058-11066.
- Y. Xu, J. Duan, J. Du, X. Yang, Y. Duan, Q. Tang, Flexible, *ChemSusChem*, 2021, **14**, 1512-1516.
- G. Xie, X. Lu, J. Duan, Y. Dong, X. Jiang, F. Tu, Y. Duan, Q. Tang, *J. Mater. Chem. A*, 2021, **9**, 15003-15011.
- M. Wang, J. Duan, J. Du, X. Yang, Y. Duan, T. Zhang, Q. Tang, *ACS Appl. Mater. Interfaces*, 2021, **13**, 12091-12098.
- X. Sun, B. He, J. Zhu, R. Zhu, H. Chen, Y. Duan, Q. Tang, *Chem. Eng. J.*, 2021, **412**, 128727.
- W.W. Liu, Y.C. Liu, C.Y. Cui, S.T. Niu, W.J. Niu, M.C. Liu, M.J. Liu, B. Gu, L.Y. Zhang, K. Zhao, F. Ran, Y.L. Chueh,

- Materials Today Energy*, 2021, **21**, 100782.
18. Z. Gong, B. He, J. Zhu, X. Yao, S. Wang, H. Chen, Y. Duan, Q. Tang, *Solar RRL*, 2021, **5**, 2000819.
  19. J. Zhu, M. Tang, B. He, W. Zhang, X. Li, Z. Gong, H. Chen, Y. Duan, Q. Tang, *J. Mater. Chem. A*, 2020, **8**, 20987-20997.
  20. J. Zhu, B. He, Z. Gong, Y. Ding, W. Zhang, X. Li, Z. Zong, H. Chen, Q. Tang, *ChemSusChem*, 2020, **13**, 1834-1843.
  21. W. Zhang, X. Liu, B. He, J. Zhu, X. Li, K. Shen, H. Chen, Y. Duan, Q. Tang, *ACS Appl. Mater. Interfaces*, 2020, **12**, 36092-36101.
  22. W. Zhang, X. Liu, B. He, Z. Gong, J. Zhu, Y. Ding, H. Chen, Q. Tang, *ACS Appl. Mater. Interfaces*, 2020, **12**, 4540-4548.
  23. Y. Xu, J. Duan, X. Yang, J. Du, Y. Wang, Y. Duan, Q. Tang, *J. Mater. Chem. A*, 2020, **8**, 11859-11866.
  24. T. Xiang, Y. Zhang, H. Wu, J. Li, L. Yang, K. Wang, J. Xia, Z. Deng, J. Xiao, W. Li, Z. Ku, F. Huang, J. Zhong, Y. Peng, Y.-B. Cheng, *Solar Energ. Mater. Sol. C.*, 2020, **206**, 110317.
  25. Y. Ren, N. Zhang, Z. Arain, M. Mateen, J. Chen, Y. Sun, Z. Li, *J. Power Sources*, 2020, **475**, 228676.
  26. Y. Pei, H. Guo, Z. Hu, J. Zhang, Y. Zhu, *J. Alloy. Compd.*, 2020, **835**, 155283.
  27. X. Cao, G. Zhang, L. Jiang, Y. Cai, Y. Gao, W. Yang, X. He, Q. Zeng, G. Xing, Y. Jia, J. Wei, *Water, ACS Appl. Mater. Interfaces*, 2020, **12**, 5925-5931.
  28. X. Cao, G. Zhang, Y. Cai, L. Jiang, Y. Chen, X. He, Q. Zeng, Y. Jia, G. Xing, J. Wei, *Appl. Surf. Sci.*, 2020, **529**, 147119.
  29. F. Bu, B. He, Y. Ding, X. Li, X. Sun, J. Duan, Y. Zhao, H. Chen, Q. Tang, *Solar Energ. Mater. Sol. C.*, 2020, **205**, 110267.
  30. Y. Zhao, J. Duan, H. Yuan, Y. Wang, X. Yang, B. He, Q. Tang, *Solar RRL*, 2019, **3**, 1800284.
  31. R.B.K. Siram, M.V. Khenkin, A. Niazov-Elkan, M.A. K. H. Weissman, E.A. Katz, I. Visoly-Fisher, B. Rybtchinski, *Nanoscale*, 2019, **11**, 3733-3740.
  32. H. Guo, Y. Pei, J. Zhang, C. Cai, K. Zhou, Y. Zhu, *J. Mater. Chem. C*, 2019, **7**, 11234-11243.
  33. Y. Ding, B. He, J. Zhu, W. Zhang, G. Su, J. Duan, Y. Zhao, H. Chen, Q. Tang, *ACS Sustain. Chem. Eng.*, 2019, **7**, 19286-19294.
  34. P. Teng, X. Han, J. Li, Y. Xu, L. Kang, Y. Wang, Y. Yang, T. Yu, *ACS Appl. Mater. Interfaces*, 2018, **10**, 9541-9546.
  35. I. Poli, J. Baker, J. McGettrick, F. De Rossi, S. Eslava, T. Watson, P.J. Cameron, *J. Mater. Chem. A*, 2018, **6**, 18677-18686.
  36. G. Liao, J. Duan, Y. Zhao, Q. Tang, *Solar Energy*, 2018, **171**, 279-285.
  37. Q. Li, J. Bai, T. Zhang, C. Nie, J. Duan, Q. Tang, *Chem. Commun.*, 2018, **54**, 9575-9578.
  38. X. Chang, W. Li, L. Zhu, H. Liu, H. Geng, S. Xiang, J. Liu, H. Chen, *ACS Appl. Mater. Interfaces*, 2016, **8**, 33649-33655.
